# Supplementary material for: Efficiency and active sites of the synergetic sorption and photocatalysis in Cr(vi) decontamination on a 3D oxidized graphene ribbon framework
Source: Royal Society of Chemistry journal article supplement (doi:10.1039/d0ta01847c), 2020-01-01
Supplement: d0ta01847c1.pdf [file d0ta01847c1.pdf]

1                                    **Electronic Supplementary Information**

2            **Efficiency and active sites of the synergetic sequestration of**  
3 **sorption and photocatalysis in Cr(VI) decontamination on 3D**  
4 **oxidized graphene ribbons framework**

5    Zhe Ding,<sup>abc</sup> Jianjun Liang,<sup>\*ab</sup> Wentao Zhang,<sup>abc</sup> Wei Wang,<sup>abc</sup> Rongyue Geng,<sup>abc</sup>

6                                    Yun Wang,<sup>abc</sup> Ping Li,<sup>ab</sup> and Qiaohui Fan<sup>\*ab</sup>

7    <sup>a</sup> *Northwest Institute of Eco-Environment and Resources, Chinese Academy of*  
8 *Sciences, Lanzhou 730000, China*

9    <sup>b</sup> *Key Laboratory of Petroleum Resources, Gansu Province, Lanzhou 730000, China*

10 <sup>c</sup> *University of Chinese Academy of Sciences, Beijing 100049, China*

11

12 \*Corresponding Authors

13 E-mail: [liangjj@lzb.ac.cn](mailto:liangjj@lzb.ac.cn); [fanqh@lzb.ac.cn](mailto:fanqh@lzb.ac.cn)

14 Total number of Pages: 7

15 Total number of Tables: 3

16 Total number of Figures: 3

## 18 **Materials and instruments**

19 All reagents were not further purified or modified after buy unless mentioned later. PA (the  
20 average molecular weight  $M_w = 15000$ ), multi-wall carbon nanotubes,  $K_2Cr_2O_7$  and  $Cr_2O_3$  were  
21 purchase from Sigma-Aldrich.

22 The morphologies of materials were obtained by an Apreo S field emission scanning electron  
23 microscope (SEM) and a Tecnai-G2-F30 transmission electron microscope (TEM), respectively.  
24 The element compositions and chemical mappings were examined using energy-dispersive  
25 spectroscopy (EDS) equipped in TEM. Fourier transform infrared spectroscopy (FT-IR) patterns  
26 were measured from 4000 to 400  $cm^{-1}$  with a resolution of 4  $cm^{-1}$  using a Bruker ALPHA  
27 spectrometer with pure KBr as the background. X-ray diffraction (XRD) characterization was  
28 recorded on an X'Pert pro Panalytical diffractometer equipped with a rotation anode, operating at  
29 40 kV and 30 mA using Cu  $K\alpha$  radiation. Brunauer-Emmett-Teller (BET) specific surface area and  
30 pore parameters were analyzed via the nitrogen isotherms at  $-196.6\text{ }^\circ\text{C}$  in virtue of Micromeritics  
31 ASAP 2020. Occurrence states of elements can be perceived with the help of X-ray photoelectron  
32 spectroscopy (XPS) measurements using Kratos AXIS Ultra<sup>DLD</sup> spectrometer with an Al  $K\alpha$   
33 monochromated source. In order to avoid the deviation caused by charge effect, the XPS results  
34 were corrected according to C 1s peak at 284.6 eV of the surface adventitious carbon. Cr(VI)  
35 concentration and adsorption spectra of the precursors were observed by a Shimadzu UV-2600A  
36 spectrophotometer. The valence band (VB) structure was obtained from Thermo Fisher ESCALAB  
37 250Xi with a He I UV source. The photocurrent was conducted on a CHI 660E electrochemical  
38 workstation (Shanghai Chenhua, China) using a classical three-electrode system.

## 39 **Preparation of 3D carbon-based remediation material**

40 We obtained oxidized graphene ribbons (OGRs) via longitudinally unzipping multi-wall carbon  
41 nanotubes in concentrated sulphuric acid mixed 600 wt%  $KMnO_4$ <sup>1</sup>. After isolation, the OGRs were  
42 purified by the dialysis until the remnant manganese ions and sulfate radical cannot be detected by  
43 the inductively coupled plasma mass spectroscopy (ICP-MS).

44 3D carbon framework was prepared according to our previous researches<sup>2,3</sup>. The obtained  
45 precursor (OGRs, 50 mg) were dispersed via ultrasonic exfoliation of 30 minutes in 18.2  $M\Omega\cdot\text{cm}$   
46  $H_2O$  (140 mL) at the 10  $^\circ\text{C}$ . Subsequently, 2.5 % dispersion solution of PA crosslinker (8.85 mL)  
47 was slowly dropped into homogeneous precursor solutions under ultrasound. The mixture instantly

48 assembled into the hydrogel. Then, the hydrogel was freeze-dried. The mass ratio of precursor and  
49 PA was designed as 1: 2.7. The as-prepared composite was named P-OGR.

#### 50 **Photocurrent tests**

51 The photocurrent response was tested in typical three-electrode system with Pt sheet as counter  
52 electrode and Ag/AgCl as reference electrode, respectively <sup>4</sup>. Clear working electrode (FTO glass,  
53 active area 1 cm<sup>2</sup>) was coated with slurry, composed of 10 mg tested sample, 0.95 mL ethyl alcohol  
54 and 50  $\mu$ L Nafion. The photoelectrochemical cell was filled with 0.1 mol L<sup>-1</sup> of Na<sub>2</sub>SO<sub>4</sub> electrolyte  
55 solution. A 300 W Xe lamp was selected as the light source, located 15 cm away from the cell. The  
56 transient photocurrent was recorded at intervals of 10 s on-off cycles.

#### 57 **Photo-sequestration kinetics of Cr(VI)**

58 OGRs or P-OGR suspension, deionized water, NaCl and Cr(VI) stock solutions were accurately  
59 weighed and added into the quartz beaker to gain the target concentrations (the mass-to-volume  
60 ( $m/V$ ) = 0.2 g L<sup>-1</sup> for OGRs, and 0.5 g L<sup>-1</sup> for P-OGR, I = 0.5 mM NaCl, and  $C_{\text{initial Cr(VI)}} = 2.0$  mM).  
61 The total volume of the dispersion was set as 500 mL, and pH value was adjusted to be 5.70. Firstly,  
62 the beaker stood in the dark for 1 h to ensure the sorption equilibrium. Next, a 300 W Xe lamp was  
63 turned on for the stable irradiation, located 15 cm away from the test beaker (in P-OGR experiments,  
64 both sunlight and Xe lamp were used). The samples were periodically collected and filtrated with  
65 0.22  $\mu$ m filter membranes. Then, the solids were freeze-dried in the dark, accurately weight, and  
66 performed FT-IR analysis to evaluate Cr occurrence states. Cr(VI) concentrations in the filtrates  
67 were determined via the colorimetric method.

68

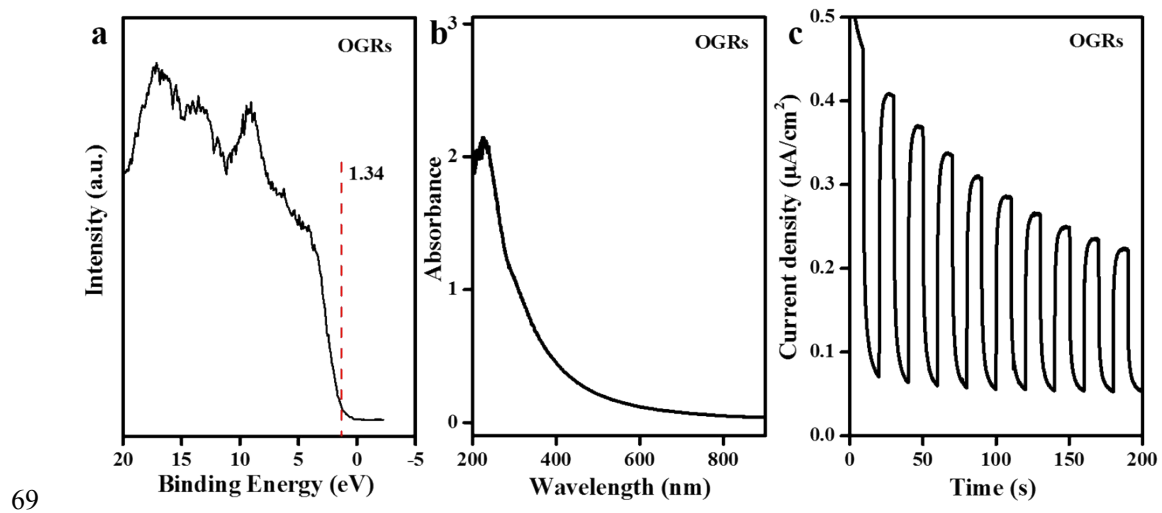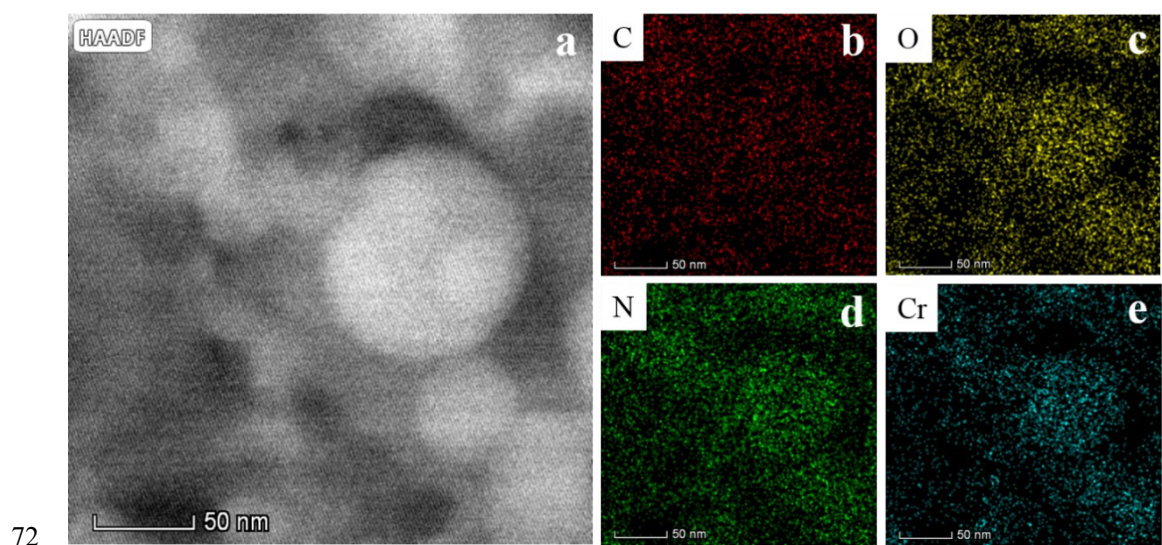

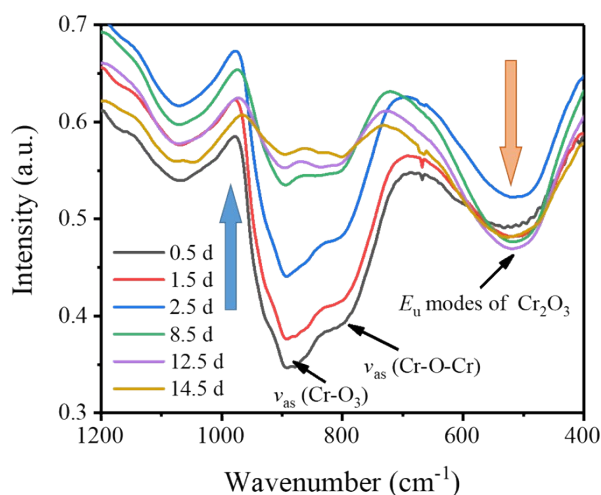

77

78 Fig. S3. FT-IR spectra of Cr(VI) photo-sequestration procedure on P-OGR ( $I = 0.5$  mM NaCl, pH  
 79  $= 5.7$ ,  $m/V = 0.5$  g/L). notes: the tests were conducted in spring, all others were done in autumn.  
 80 Because of lower temperature and shorter sunlight times in spring, Cr(VI) photoreduction was  
 81 prolonged to 14.5 days.

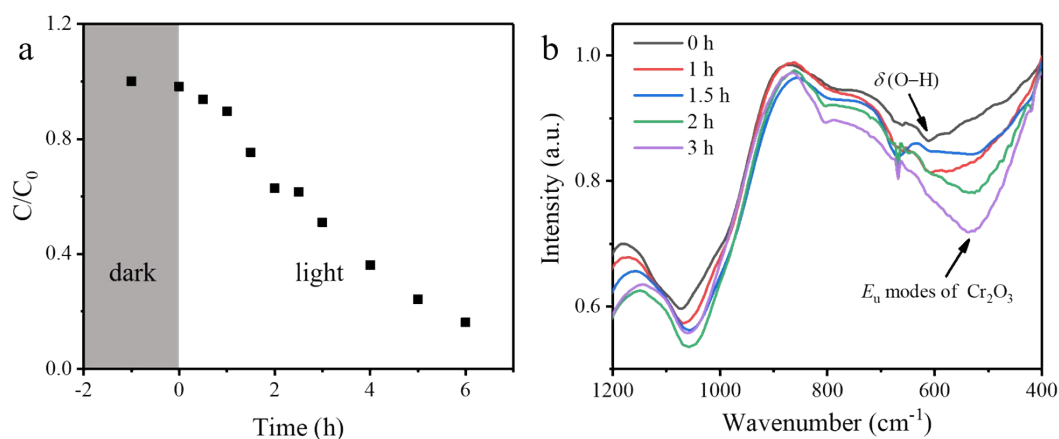

82

83 Fig. S4. (a) Photo-sequestration kinetics of Cr(VI) on OGRs under the illumination of 300 W Xe  
 84 lamp, (b) FT-IR analyses of Cr(VI) photo-sequestration on OGRs ( $I = 0.5$  mM NaCl, pH  $= 5.7$ ,  
 85  $C_{\text{initial Cr(VI)}} = 2.0$  mM,  $m/V = 0.2$  g/L).

86 In the dark, electrostatic repulsion between OGRs and Cr(VI) anions resulted in a negligible  
 87 sorption capacity for Cr(VI). As the irradiation started, Cr(VI) concentration showed an obvious  
 88 decline, and  $\sim 84$  % Cr(VI) were removed after 6 hours (as shown in Fig. S4a). FT-IR suggested the  
 89 absence of Cr(VI) characteristic bands at  $890$   $\text{cm}^{-1}$  and  $800$   $\text{cm}^{-1}$ , indicating that scarce Cr(VI) was  
 90 adsorbed on the surface of OGRs (Fig. S4b). Along with the irradiation of Xe lamp,  $E_u$  modes of  
 91  $\text{Cr}_2\text{O}_3$  turned obvious at  $530$   $\text{cm}^{-1}$ , suggesting that Cr(VI) was photo-sequestered and transformed  
 92 into  $\text{Cr}_2\text{O}_3$  on OGRs.

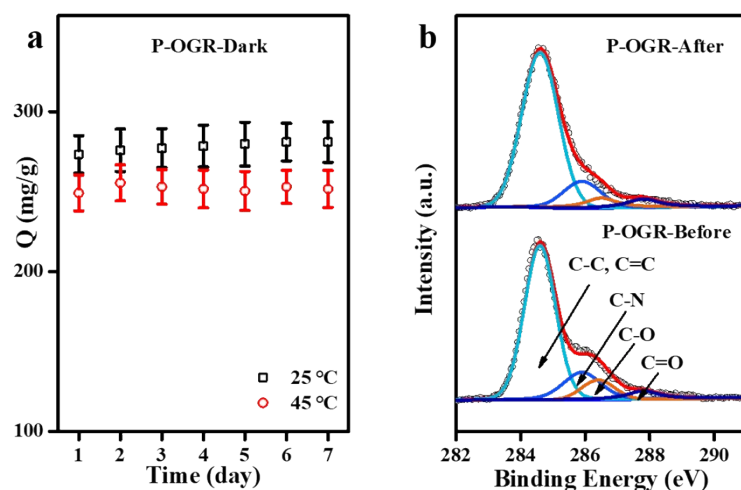

93

94 Fig. S5. (a) Photothermic effect on Cr(VI) decontamination, (b) C1s fine spectra in P-OGR before  
 95 and after the reaction in the dark ( $T = 298 \pm 1$  K,  $I = 0.5$  mM NaCl,  $C_{\text{initial Cr(VI)}} = 5.8$  mM and  $m/V$   
 96  $= 0.5$  g L<sup>-1</sup>).

97 Table S1 The C1s fine spectra of P-OGR.

| Sample | C-C, C=C            |               | C-N                 |               | C-O                 |               | C=O                 |               |
|--------|---------------------|---------------|---------------------|---------------|---------------------|---------------|---------------------|---------------|
|        | Binding Energy (eV) | Relative Area |
| OGRs   | 284.6               | 47.19%        | —                   | —             | 286.75              | 38.97%        | 288.39              | 13.85%        |
| P-OGR  | 284.60              | 69.31%        | 285.90              | 16.08%        | 286.40              | 8.97%         | 287.80              | 5.64%         |

98 Table S2 The BET profiles of P-OGR.

| Materials | BET surface area (m <sup>2</sup> g <sup>-1</sup> ) | Total pore volume (×10 <sup>-3</sup> cm <sup>3</sup> g <sup>-1</sup> ) | Average pore width (nm) |
|-----------|----------------------------------------------------|------------------------------------------------------------------------|-------------------------|
| P-OGR     | 2.05                                               | 3.04                                                                   | 4.79                    |

99 Table S3 The comparison of C1s XPS results on the P-OGR before and after reacting with Cr(VI).

| Sample       | C-C, C=C            |               | C-N                 |               | C-O                 |               | C=O                 |               |
|--------------|---------------------|---------------|---------------------|---------------|---------------------|---------------|---------------------|---------------|
|              | Binding Energy (eV) | Relative Area |
| P-OGR-Before | 284.60              | 69.31%        | 285.90              | 16.08%        | 286.40              | 8.97%         | 287.80              | 5.64%         |
| P-OGR-After  | 284.60              | 74.31%        | 285.90              | 13.68%        | 286.50              | 6.43%         | 287.80              | 5.58%         |

100

101 ■ REFERENCES

- 102 1 D.V Kosynkin, A.L. Higginbotham, A. Sinitskii, J.R. Lomeda, A. Dimiev, B.K. Price and J.M.  
103 Tour, *Nature*, 2009, **458**, 872–876.
- 104 2 J. Liang, B. He, P. Li, J. Yu, X. Zhao, H. Wu, J. Li, Y. Sun and Q. Fan, *Chem. Eng. J.*, 2019,  
105 **358**, 552–563.
- 106 3 J. Liang, Z. Ding, H. Qin, J. Li, W. Wang, D. Luo, R. Geng, P. Li and Q. Fan, *Environ. Pollut.*,  
107 2019, **251**, 945–951.
- 108 4 J. Zhang, J. Yu, M. Jaroniec and J. R. Gong, *Nano Lett.* 2012, **12**, 4584–4589.
